# Supplementary material
Source: Springer Nature journal article supplement (https://www.springermedizin.de/resource/supplementary/12936_2012_2635_MOESM7_ESM.pdf/9544882)
Supplement: MOESM7 [file 9544882]

# July 2009

# December 2010

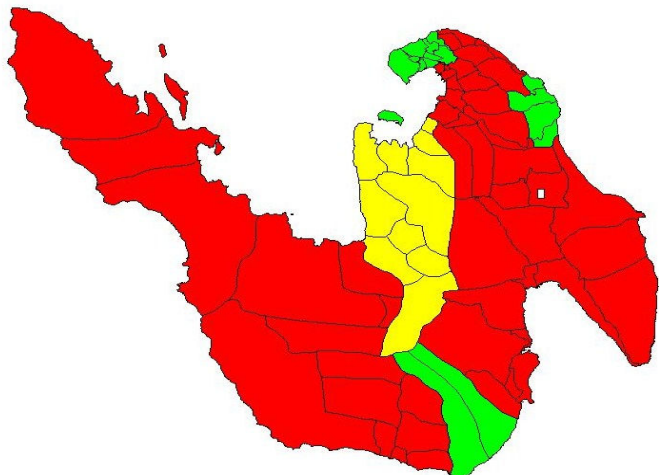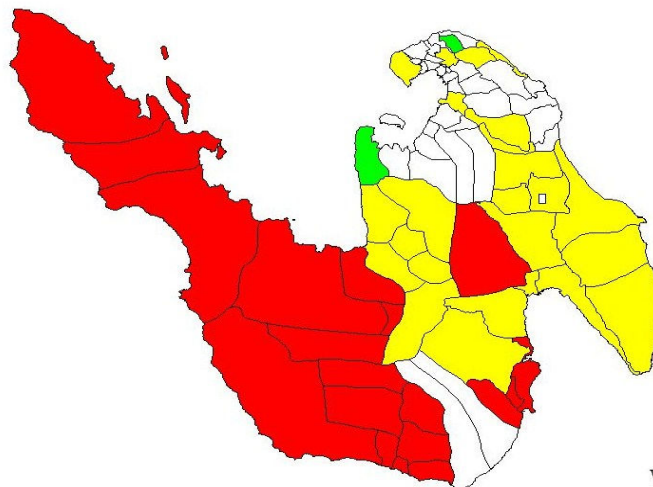

6 0 6 12 Kilometers

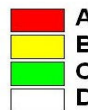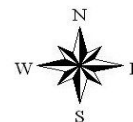

| Key Classification of FOCUS |                                                                                                                 | Operational definition                                                                                                                                                                                                                                                                     |
|-----------------------------|-----------------------------------------------------------------------------------------------------------------|--------------------------------------------------------------------------------------------------------------------------------------------------------------------------------------------------------------------------------------------------------------------------------------------|
| <b>A</b>                    | Indigenous malaria cases (+); Local transmission (+); Ineffective vector control and health system              | <b>No local transmission:</b> No indigenous malaria cases reported in 3 consecutive years.                                                                                                                                                                                                 |
| <b>B</b>                    | Indigenous malaria cases (+); Local transmission (+); Effective control with high coverage of key interventions | <b>Effective control:</b> $\geq 90\%$ suspect malaria cases confirmed with microscope; $\geq 90\%$ malaria cases treated by ACT + Primaquine; Coverage of LLINs or IRS $\geq 80\%$ ; Sensitivity & Specificity of Microscopist $\geq 80\%$ ; $\geq 90\%$ of malaria cases are investigated |
| <b>C</b>                    | No indigenous malaria cases; Import cases (+)                                                                   | <b>Import case:</b> confirmed malaria cases transmitted to the patient outside of Sabang, as per result of investigation and interview.                                                                                                                                                    |
| <b>D</b>                    | No indigenous malaria cases; No Import cases                                                                    |                                                                                                                                                                                                                                                                                            |
